# Supplementary material for: Phylogenetic Analyses of Xanthomonads Causing Bacterial Leaf Spot of Tomato and Pepper: Xanthomonas euvesicatoria Revealed Homologous Populations Despite Distant Geographical Distribution
Source: PubMed Central journal article supplement (PMC6843189; doi:10.3390/microorganisms7100462), 2019-10-16
Supplement: microorganisms-07-00462-s001.pdf [file microorganisms-07-00462-s001.pdf]

## Supplementary Materials

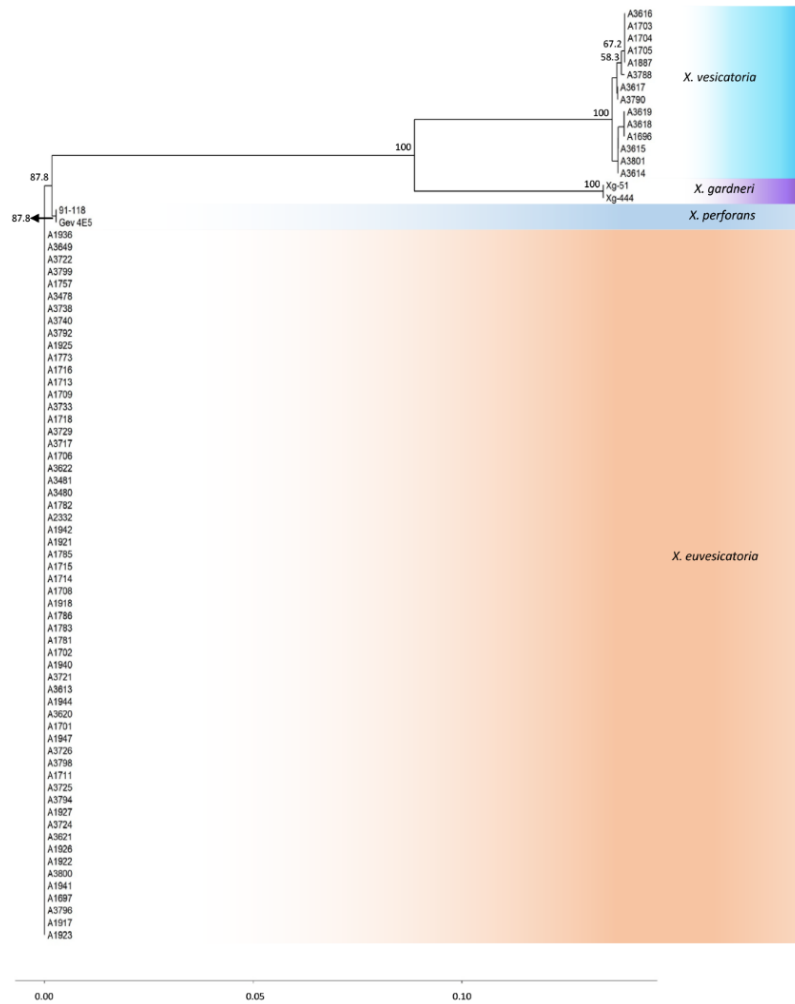

**Figure S1.** Phylogenetic analysis of *Xanthomonas euvesicatoria*, *X. vesicatoria*, *X. gardneri*, and *X. perforans* using *hrcN* gene. Strain information is provided in Table 1. Numbers on the nodes represent bootstrap values and are presented as percentage of 1000 replicates. Line in the bottom represents the scale bar that shows the distance between the species.

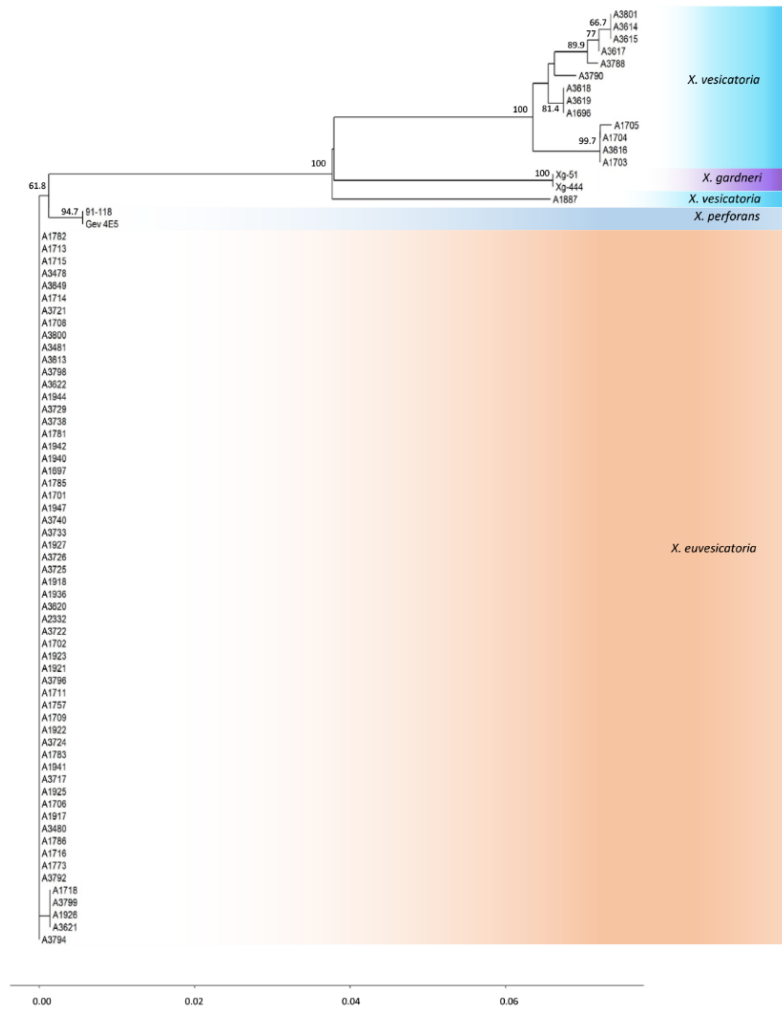

**Figure S2.** Phylogenetic analysis of *Xanthomonas euvesicatoria*, *Xanthomonas vesicatoria*, *X. gardneri*, and *X. perforans* using chromosomal replication initiator factor (*dnaA*) gene. Strain information is provided in Table 1. Numbers on the nodes represent bootstrap values and are presented as percentage of 1000 replicates. Line in the bottom represents the scale bar that shows the distance between the species.

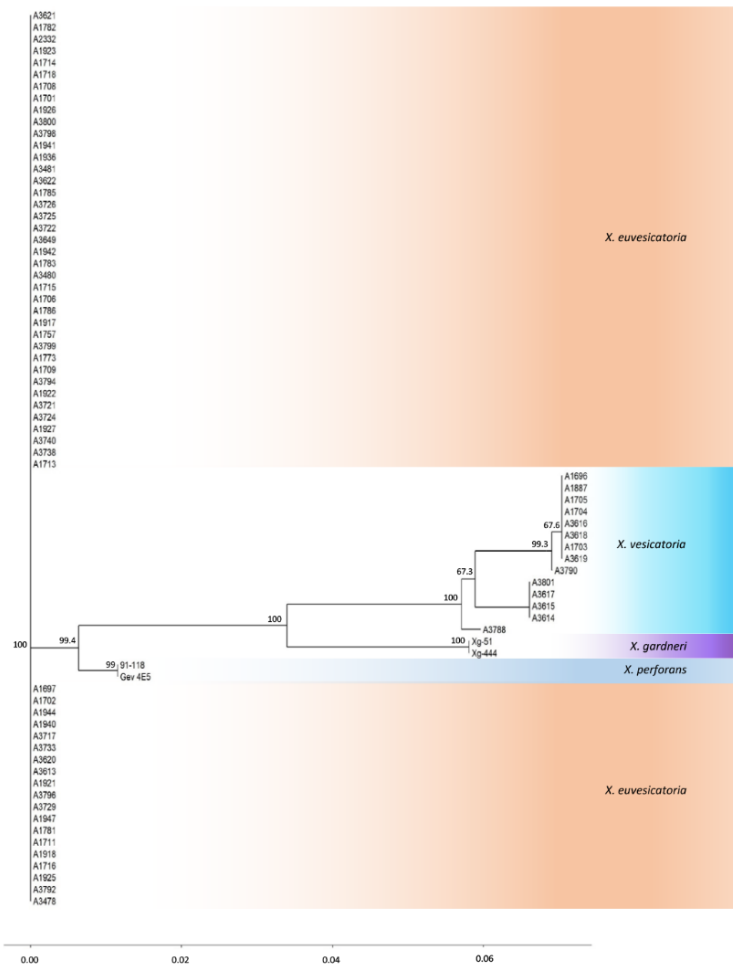

**Figure S3.** Phylogenetic analysis of *Xanthomonas euvesicatoria*, *Xanthomonas vesicatoria*, *X. gardenri*, and *X. perforans* using DNA topoisomerase (ATP-hydrolyzing) subunit B (*gyrB*) gene. Strain information is provided in Table 1. Numbers on the nodes represent bootstrap values and are presented as percentage of 1000 replicates. Line in the bottom represents the scale bar that shows the distance between the species.

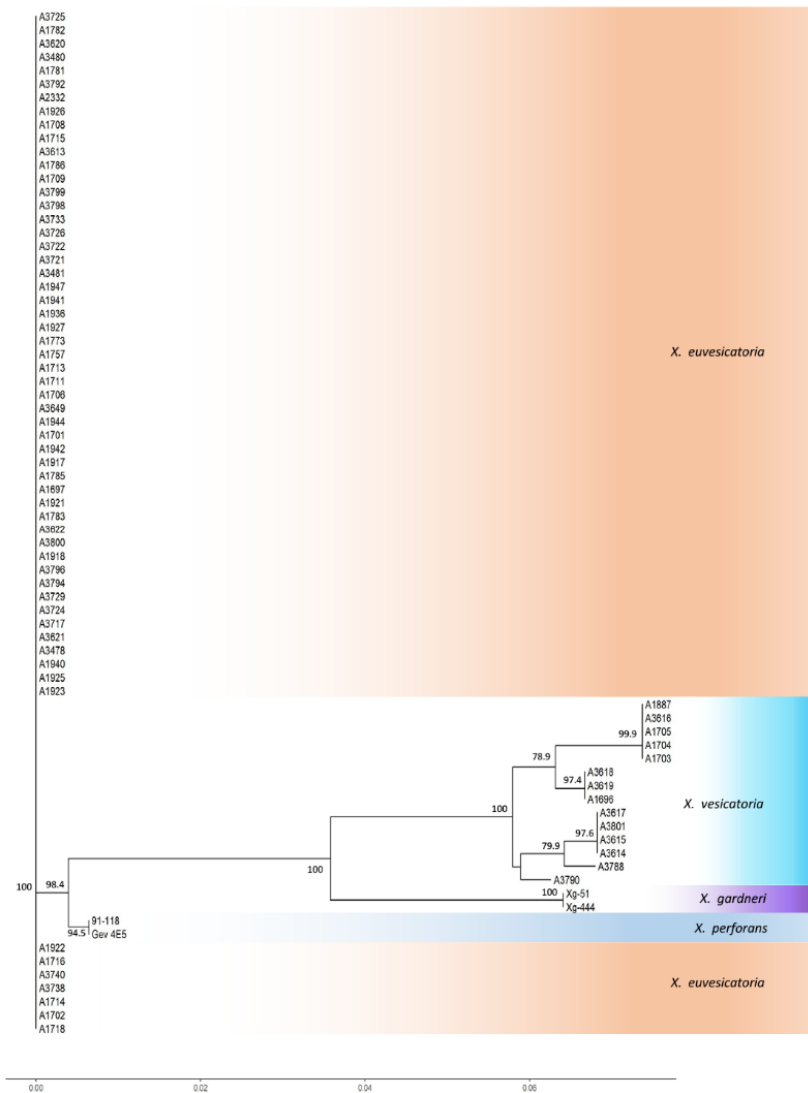

**Figure S4.** Phylogenetic analysis of *Xanthomonas euvesicatoria*, *Xanthomonas vesicatoria*, *X. gardenri*, and *X. perforans* using type I glyceraldehyde-3-phosphate dehydrogenase (*gapA*) gene. Strain information is provided in Table 1. Numbers on the nodes represent bootstrap values and are presented as percentage of 1000 replicates. Line in the bottom represents the scale bar that shows the distance between the species.

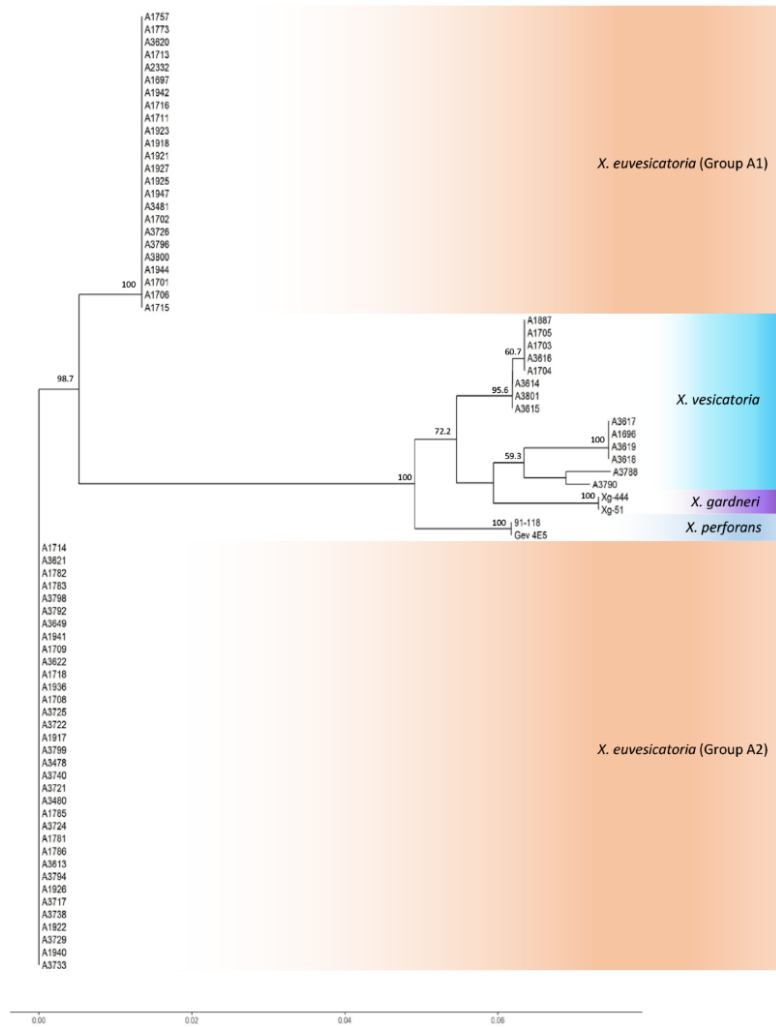

**Figure S5.** Phylogenetic analysis of *Xanthomonas euvesicatoria* and *Xanthomonas vesicatoria* using pyruvate dehydrogenase (*pdg*) gene. Strain information is provided in Table 1. Numbers on the nodes represent bootstrap values and are presented as percentage of 1000 replicates. Line in the bottom represents the scale bar that shows the distance between the species.

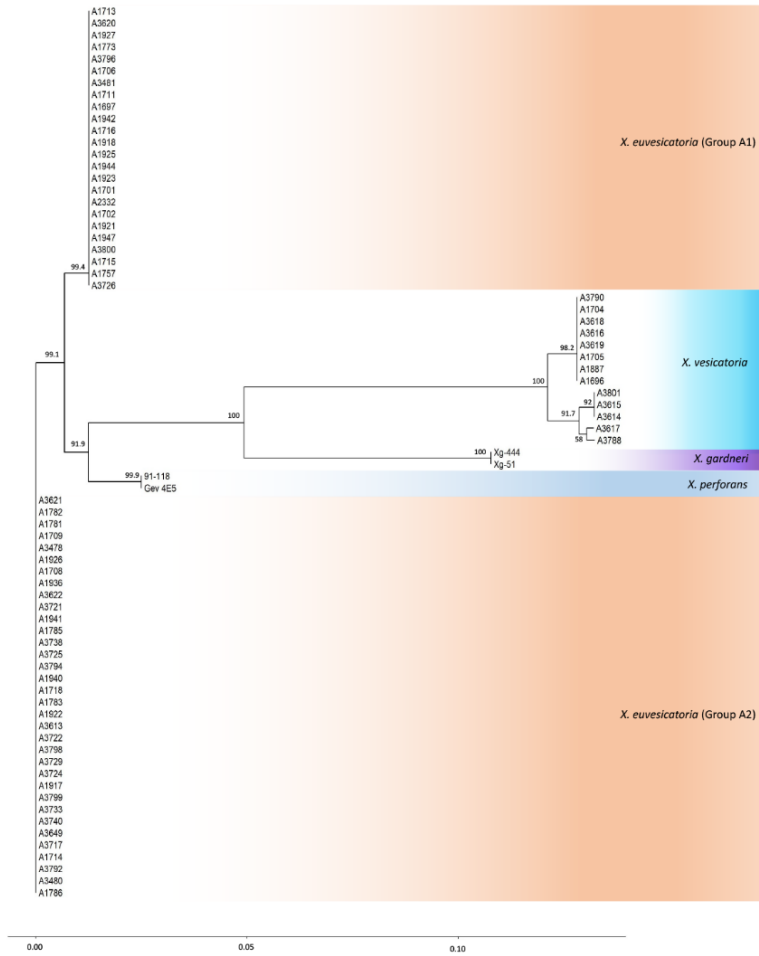

**Figure S6.** Phylogenetic analysis of *Xanthomonas euvesicatoria*, *Xanthomonas vesicatoria*, *X. gardneri*, and *X. perforans* using (*hmbs*) gene. Strain information is provided in Table 1. Numbers on the nodes represent bootstrap values and are presented as percentage of 1000 replicates. Line in the bottom represents the scale bar that shows the distance between the species.

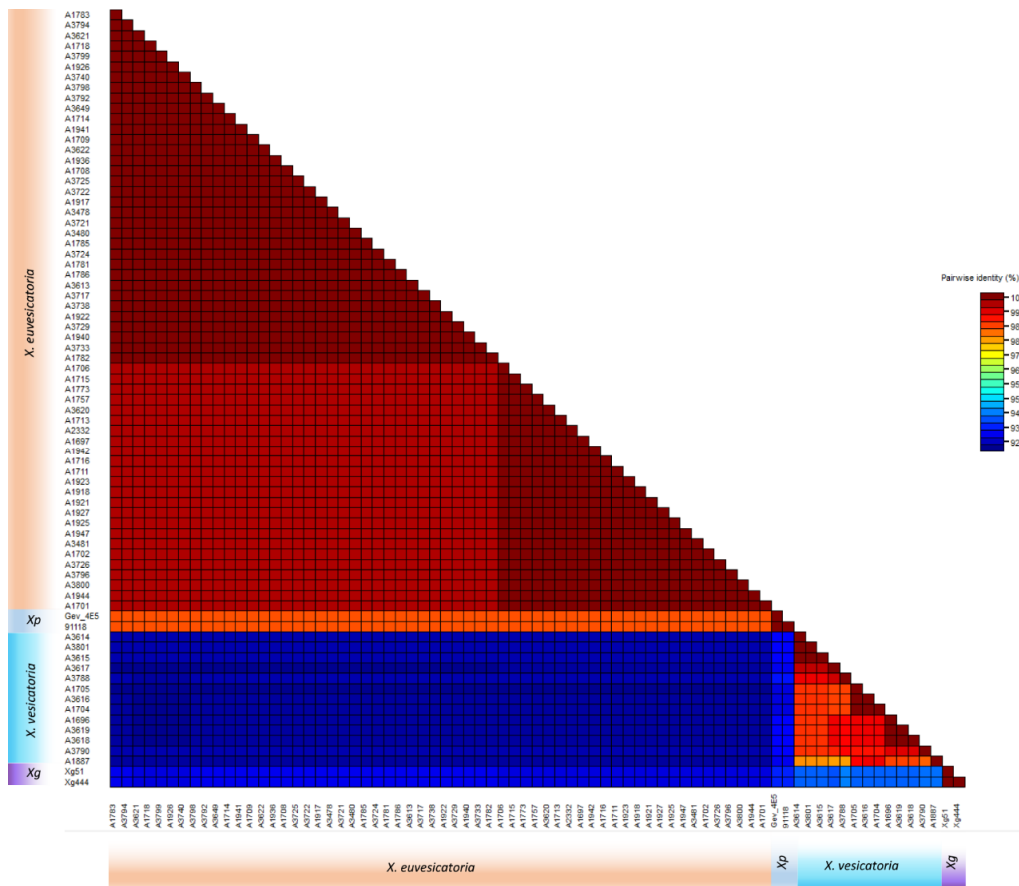

**Figure S7.** Color-coded matrix showing pairwise percentage identity of *X. euvesicatoria*, *X. vesicatoria*, *X. perforans*, and *X. gardneri* isolates used in the study for using EscN/YscN/HrcN family type III secretion system ATPase (*hrcN*), chromosomal replication initiator factor (*dnaA*), DNA topoisomerase (ATP-hydrolyzing) subunit B (*gyrB*), type I glyceraldehyde-3-phosphate dehydrogenase (*gapA*), hydroxymethylbilane synthase (*hmbs*), and pyruvate dehydrogenase (*pdg*) genes. Table S1: List of GenBank accession numbers for the strains sequenced for genes EscN/YscN/HrcN family type III secretion system ATPase (*hrcN*), chromosomal replication initiator factor (*dnaA*), DNA topoisomerase (ATP-hydrolyzing) subunit B (*gyrB*), type I glyceraldehyde-3-phosphate dehydrogenase (*gapA*), pyruvate dehydrogenase (*pdg*), and hydroxymethylbilane synthase (*hmbs*).

**Table S1:** List of GenBank accession numbers for the strains sequenced for genes, EscN/YscN/HrcN family type III secretion system ATPase (*hrcN*), chromosomal replication initiator factor (*dnaA*), DNA topoisomerase (ATP-hydrolyzing) subunit B (*gyrB*), type I glyceraldehyde-3-phosphate dehydrogenase (*gapA*), pyruvate dehydrogenase (*pdg*) and hydroxymethylbilane synthase (*hmbs*).

| Strain ID | Strain                           | <i>gyrB</i> | <i>pdg</i> | <i>hmbs</i> | <i>dnaA</i> | <i>gapA</i> | <i>hrcN</i> |
|-----------|----------------------------------|-------------|------------|-------------|-------------|-------------|-------------|
| A1701     | <i>Xanthomonas euvesicatoria</i> | MH481384    | MH484500   | MH492100    | MH492152    | MH492218    | MG847408*   |
| A1711     | <i>X. euvesicatoria</i>          | MH481429    | MH484487   | MH492092    | MH492168    | MH492214    | MG847400*   |
| A3620     | <i>X. euvesicatoria</i>          | MH481422    | MH484481   | MH492085    | MH492161    | MH492189    | MH510054    |
| A1782     | <i>X. euvesicatoria</i>          | MH481375    | MH484443   | MH492051    | MH492112    | MH492187    | MH510047    |
| A1781     | <i>X. euvesicatoria</i>          | MH481428    | MH484468   | MH492053    | MH492147    | MH492191    | MG847392*   |
| A1786     | <i>X. euvesicatoria</i>          | MH481402    | MH484469   | MH492084    | MH492180    | MH492198    | MG847389*   |
| A3480     | <i>X. euvesicatoria</i>          | MH481399    | MH484465   | MH492083    | MH492179    | MH492190    | MG847376*   |
| A3478     | <i>X. euvesicatoria</i>          | MH481434    | MH484462   | MH492055    | MH492134    | MH492234    | MG847378*   |
| A1702     | <i>X. euvesicatoria</i>          | MH481417    | MH484495   | MH492102    | MH492164    | MH492243    | MG847407*   |
| A1706     | <i>X. euvesicatoria</i>          | MH481401    | MH484445   | MH492090    | MH492177    | MH492215    | MG847403*   |
| A1708     | <i>X. euvesicatoria</i>          | MH481383    | MH484457   | MH492057    | MH492138    | MH492195    | MG847402*   |
| A1709     | <i>X. euvesicatoria</i>          | MH481407    | MH484453   | MH492054    | MH492170    | MH492199    | MG847401*   |
| A1713     | <i>X. euvesicatoria</i>          | MH481415    | MH484482   | MH492086    | MH492114    | MH492213    | MG847399*   |
| A1714     | <i>X. euvesicatoria</i>          | MH481381    | MH484451   | MH492081    | MH492136    | MH492242    | MG847398*   |
| A1715     | <i>X. euvesicatoria</i>          | MH481400    | MH484446   | MH492106    | MH492133    | MH492196    | MG847397*   |
| A1716     | <i>X. euvesicatoria</i>          | MH481431    | MH484486   | MH492095    | MH492181    | MH492239    | MG847396*   |
| A1718     | <i>X. euvesicatoria</i>          | MH481382    | MH484455   | MH492067    | MH492110    | MH492244    | MG847395*   |
| A1757     | <i>X. euvesicatoria</i>          | MH481404    | MH484480   | MH492107    | MH492169    | MH492212    | MG847394*   |
| A1773     | <i>X. euvesicatoria</i>          | MH481406    | MH484479   | MH492088    | MH492182    | MH492211    | MG847393*   |
| A1783     | <i>X. euvesicatoria</i>          | MH481398    | MH484447   | MH492068    | MH492173    | MH492224    | MG847391*   |
| A1785     | <i>X. euvesicatoria</i>          | MH481392    | MH484466   | MH492062    | MH492151    | MH492221    | MG847390*   |
| A1917     | <i>X. euvesicatoria</i>          | MH481403    | MH484460   | MH492075    | MH492178    | MH492220    | MH510069    |
| A1918     | <i>X. euvesicatoria</i>          | MH481430    | MH484489   | MH492096    | MH492159    | MH492227    | MG847386*   |
| A3799     | <i>X. euvesicatoria</i>          | MH481405    | MH484461   | MH492076    | MH492109    | MH492200    | MG847367*   |
| A1921     | <i>X. euvesicatoria</i>          | MH481424    | MH484490   | MH492103    | MH492166    | MH492223    | MG847385*   |
| A1922     | <i>X. euvesicatoria</i>          | MH481409    | MH484475   | MH492069    | MH492171    | MH492238    | MG847384*   |
| A1923     | <i>X. euvesicatoria</i>          | MH481378    | MH484488   | MH492099    | MH492165    | MH492237    | MG847383*   |
| A1925     | <i>X. euvesicatoria</i>          | MH481432    | MH484492   | MH492097    | MH492176    | MH492236    | MG847381*   |
| A1926     | <i>X. euvesicatoria</i>          | MH481385    | MH484472   | MH492056    | MH492111    | MH492194    | MH510063    |
| A3794     | <i>X. euvesicatoria</i>          | MH481408    | MH484471   | MH492065    | MH492184    | MH492229    | MH510059    |
| A3796     | <i>X. euvesicatoria</i>          | MH481425    | MH484497   | MH492089    | MH492167    | MH492228    | MH510068    |
| A3792     | <i>X. euvesicatoria</i>          | MH481433    | MH484449   | MH492082    | MH492183    | MH492192    | MH510041    |
| A3798     | <i>X. euvesicatoria</i>          | MH481387    | MH484448   | MH492072    | MH492142    | MH492201    | MH510057    |
| A3800     | <i>X. euvesicatoria</i>          | MH481386    | MH484498   | MH492105    | MH492139    | MH492226    | MH510064    |
| A1697     | <i>X. euvesicatoria</i>          | MH481416    | MH484484   | MH492093    | MH492150    | MH492222    | MH510066    |
| A1936     | <i>X. euvesicatoria</i>          | MH481389    | MH484456   | MH492058    | MH492160    | MH492209    | MH510036    |
| A1940     | <i>X. euvesicatoria</i>          | MH481419    | MH484477   | MH492066    | MH492149    | MH492235    | MH510050    |
| A1941     | <i>X. euvesicatoria</i>          | MH481388    | MH484452   | MH492061    | MH492174    | MH492208    | MH510065    |
| A3621     | <i>X. euvesicatoria</i>          | MH481376    | MH484444   | MH492052    | MH492113    | MH492233    | MH510062    |
| A3481     | <i>X. euvesicatoria</i>          | MH481390    | MH484494   | MH492091    | MH492140    | MH492206    | MH510046    |



|        |                         |          |          |          |          |          |           |
|--------|-------------------------|----------|----------|----------|----------|----------|-----------|
| A3613  | <i>X. euvesicatoria</i> | MH481423 | MH484470 | MH492070 | MH492141 | MH492197 | MH510052  |
| A3622  | <i>X. euvesicatoria</i> | MH481391 | MH484454 | MH492059 | MH492143 | MH492225 | MH510045  |
| A3649  | <i>X. euvesicatoria</i> | MH481396 | MH484450 | MH492079 | MH492135 | MH492216 | MH510037  |
| A3717  | <i>X. euvesicatoria</i> | MH481420 | MH484473 | MH492080 | MH492175 | MH492232 | MH510044  |
| A3721  | <i>X. euvesicatoria</i> | MH481410 | MH484464 | MH492060 | MH492137 | MH492205 | MH510051  |
| A3722  | <i>X. euvesicatoria</i> | MH481395 | MH484459 | MH492071 | MH492163 | MH492204 | MH510038  |
| A3724  | <i>X. euvesicatoria</i> | MH481411 | MH484467 | MH492074 | MH492172 | MH492231 | MH510061  |
| A3725  | <i>X. euvesicatoria</i> | MH481394 | MH484458 | MH492064 | MH492158 | MH492188 | MH510058  |
| A3726  | <i>X. euvesicatoria</i> | MH481392 | MH484496 | MH492108 | MH492157 | MH492203 | MH510056  |
| A3729  | <i>X. euvesicatoria</i> | MH481426 | MH484476 | MH492073 | MH492145 | MH492230 | MH510043  |
| A3733  | <i>X. euvesicatoria</i> | MH481421 | MH484478 | MH492077 | MH492155 | MH492202 | MH510042  |
| A3738  | <i>X. euvesicatoria</i> | MH481414 | MH484474 | MH492063 | MH492146 | MH492241 | MH510039  |
| A3740  | <i>X. euvesicatoria</i> | MH481413 | MH484463 | MH492078 | MH492154 | MH492240 | MH510040  |
| A1927  | <i>X. euvesicatoria</i> | MH481412 | MH484491 | MH492087 | MH492156 | MH492210 | MH510060  |
| A1942  | <i>X. euvesicatoria</i> | MH481397 | MH484485 | MH492094 | MH492148 | MH492219 | MH510049  |
| A1944  | <i>X. euvesicatoria</i> | MH481418 | MH484499 | MH492098 | MH492144 | MH492217 | MH510053  |
| A1947  | <i>X. euvesicatoria</i> | MH481427 | MH484493 | MH492104 | MH492153 | MH492207 | MH510055  |
| A2332  | <i>X. euvesicatoria</i> | MH481377 | MH484483 | MH492101 | MH492162 | MH492193 | MH510048  |
| A3617  | <i>X. vesicatoria</i>   | MH481447 | MH484512 | MH492046 | MH492125 | MH492258 | MG847372* |
| A3616  | <i>X. vesicatoria</i>   | MH481441 | MH484509 | MH492040 | MH492118 | MH492247 | MG847373* |
| A3618  | <i>X. vesicatoria</i>   | MH481440 | MH484514 | MH492041 | MH492122 | MH492253 | MG847371* |
| A3788  | <i>X. vesicatoria</i>   | MH481446 | MH484516 | MH492045 | MH492124 | MH492256 | MG847369* |
| A1696  | <i>X. vesicatoria</i>   | MH481443 | MH484511 | MH492034 | MH492123 | MH492254 | MG847409* |
| A1703  | <i>X. vesicatoria</i>   | MH481439 | MH484508 | NA       | MH492119 | MH492251 | MG847406* |
| A1704  | <i>X. vesicatoria</i>   | MH481444 | MH484510 | MH492038 | MH492116 | MH492250 | MG847405* |
| A1705  | <i>X. vesicatoria</i>   | MH481445 | MH484506 | MH492036 | MH492117 | MH492249 | MG847404* |
| A1887  | <i>X. vesicatoria</i>   | MH481442 | MH484507 | MH492035 | MH492115 | MH492248 | MG847387* |
| A3801  | <i>X. vesicatoria</i>   | MH481448 | MH484504 | MH492043 | MH492127 | MH492257 | MH510067  |
| A3790  | <i>X. vesicatoria</i>   | MH481438 | MH484515 | MH492039 | MH492120 | MH492255 | MG847368* |
| A3614  | <i>X. vesicatoria</i>   | MH481450 | MH484503 | MH492044 | MH492126 | MH492260 | MG847375* |
| A3615  | <i>X. vesicatoria</i>   | MH481449 | MH484505 | MH492042 | MH492128 | MH492259 | MG847374* |
| A3619  | <i>X. vesicatoria</i>   | MH481437 | MH484513 | MH492037 | MH492121 | MH492252 | MG847370* |
| Xg-51  | <i>X. gardneri</i>      | MH481436 | MH484517 | MH492047 | MH492130 | MH492246 | MG847357* |
| Xg-444 | <i>X. gardneri</i>      | MH481435 | MH484518 | MH492048 | MH492129 | MH492245 | MG847356* |
| Gev4E  |                         |          |          |          |          |          |           |
| 5      | <i>X. perforans</i>     | MH481379 | MH484501 | MH492049 | MH492131 | MH492185 | MG847358* |
| 91-118 | <i>X. perforans</i>     | MH481380 | MH484502 | MH492050 | MH492132 | MH492186 | MG847412* |

NA: Isolate 1703 failed to provide specific product with the primers used, thus, no sequence is available. \*refers to the sequences reported earlier in Larrea-Sarmiento et al (2018).
